# Supplementary material
Source: PubMed Central journal article supplement (PMC2650358)
Supplement: 0806798106_ST1_PDF.pdf [file 0806798106_ST1_PDF.pdf]

**Table S1.** Distribution of lactate utilization genes across diverse bacterial species

| Organism                                      | L-LDH | Predicted L-LDH | D-LDH | Predicted D-LDH | Lactate permease | Transcript. regulators |
|-----------------------------------------------|-------|-----------------|-------|-----------------|------------------|------------------------|
|                                               | LldD  | LldEFG          | Dld   | Dld-II          | LldP             | R1, R2, R3             |
| <b>Actinobacteria</b>                         |       |                 |       |                 |                  |                        |
| <i>Acidobacteria bacterium Ellin345</i>       |       | +               |       | +               | +                |                        |
| <i>Brevibacterium linens BL2</i>              | ++    | +               | +     | +               | +++              |                        |
| <i>Corynebacterium diphtheriae NCTC 13129</i> |       | +               |       |                 | ++               |                        |
| <i>Corynebacterium efficiens YS-314</i>       | +     |                 |       |                 |                  |                        |
| <i>Corynebacterium glutamicum ATCC 13032</i>  | +     |                 | +     |                 |                  |                        |
| <i>Corynebacterium glutamicum ATCC 13032</i>  | +     |                 | +     |                 |                  |                        |
| <i>Corynebacterium jeikeium K411</i>          | +     |                 |       |                 |                  |                        |
| <i>Janibacter sp. HTCC2649</i>                | +     | +               |       |                 |                  |                        |
| <i>Kineococcus radiotolerans SRS30216</i>     | +     |                 |       |                 |                  |                        |
| marine actinobacterium PHSC20C1               | ++    |                 |       |                 |                  |                        |
| <i>Mycobacterium avium str. k10</i>           | +     |                 |       |                 |                  |                        |
| <i>Mycobacterium bovis AF2122/97</i>          | ++    |                 |       |                 |                  |                        |
| <i>Mycobacterium leprae TN</i>                | +     |                 |       |                 |                  |                        |
| <i>Mycobacterium marinum M</i>                | ++    |                 |       |                 |                  |                        |
| <i>Mycobacterium microti OV254</i>            | ++    |                 |       |                 |                  |                        |
| <i>Mycobacterium smegmatis str. MC2 155</i>   | +     | +               |       |                 | +                |                        |
| <i>Mycobacterium sp. MCS</i>                  | +     | +               |       |                 |                  |                        |
| <i>Mycobacterium tuberculosis CDC1551</i>     | ++    |                 |       |                 |                  |                        |
| <i>Mycobacterium tuberculosis H37Rv</i>       | ++    |                 |       |                 |                  |                        |
| <i>Propionibacterium acnes KPA171202</i>      |       | +               |       | +               | +                |                        |
| <i>Rubrobacter xylanophilus DSM 9941</i>      |       | +               |       |                 | +                |                        |
| <i>Solibacter usitatus Ellin6076</i>          |       | +               |       |                 | +                |                        |
| <i>Streptomyces avermitilis MA-4680</i>       |       | +               |       |                 | +                |                        |
| <i>Streptomyces coelicolor A3(2)</i>          |       | +               |       | +               | +                |                        |
| <i>Thermobifida fusca YX</i>                  | +     |                 |       |                 |                  |                        |
| <b>CFB / Flavobacteria group</b>              |       |                 |       |                 |                  |                        |
| <i>Bacteroides fragilis 638R</i>              |       | +               |       | +               | +                |                        |
| <i>Bacteroides fragilis ATCC 25285</i>        |       | +               |       | +               | +                |                        |
| <i>Bacteroides fragilis NCTC 9343</i>         |       | +               |       | +               | +                |                        |
| <i>Bacteroides fragilis YCH46</i>             |       | +               |       | +               | +                |                        |
| <i>Bacteroides thetaiotaomicron VPI-5482</i>  |       | +               |       |                 | +                |                        |
| <i>Flavobacteriales bacterium HTCC2170</i>    | +     |                 |       |                 |                  |                        |
| <i>Flavobacterium sp. MED217</i>              | +     |                 |       |                 |                  |                        |
| <i>Porphyromonas gingivalis W83</i>           |       | +               |       |                 | +                |                        |
| <i>Robiginitalea biformata HTCC2501</i>       | +     |                 |       |                 |                  |                        |
| <b>Cyanobacteria</b>                          |       |                 |       |                 |                  |                        |
| <i>Trichodesmium erythraeum IMS101</i>        | +     |                 |       |                 | +                |                        |
| <i>Prochlorococcus marinus str. MIT 9211</i>  | +     |                 | +     |                 |                  |                        |
| <i>Prochlorococcus marinus str. NATL2A</i>    | +     |                 |       |                 |                  |                        |
| <i>Prochlorococcus marinus str. CCMP1375</i>  | +     |                 | +     |                 | +                |                        |
| <b>Thermus/ Deinococcus</b>                   |       |                 |       |                 |                  |                        |
| <i>Deinococcus geothermalis DSM11300</i>      |       | +               |       |                 |                  |                        |
| <i>Deinococcus radiodurans R1</i>             |       | +               |       |                 | +                |                        |
| <i>Thermus thermophilus HB27</i>              |       | +               |       |                 |                  |                        |

|                                                                   |      |    |  |  |   |  |      |   |
|-------------------------------------------------------------------|------|----|--|--|---|--|------|---|
| <i>Thermus thermophilus</i> HB8                                   |      |    |  |  |   |  |      |   |
| <b>Bacillus / Clostridium group</b>                               |      |    |  |  |   |  |      |   |
| <i>Bacillus anthracis</i> str. 'Ames Ancestor'                    |      | ++ |  |  |   |  | +++  | + |
| <i>Bacillus</i> B-14905                                           |      | +  |  |  |   |  | +    | + |
| <i>Bacillus cereus</i> ZK                                         |      | ++ |  |  |   |  | +++  | + |
| <i>Bacillus clausii</i> KSM-K16                                   |      | +  |  |  |   |  | +    | + |
| <i>Bacillus halodurans</i> C-125                                  |      | +  |  |  |   |  | +++  | + |
| <i>Bacillus licheniformis</i> ATCC 14580                          |      | +  |  |  |   |  | ++   | + |
| <i>Bacillus subtilis</i> subsp. <i>subtilis</i> str. 168          |      | +  |  |  |   |  | ++   | + |
| <i>Bacillus thuringiensis</i> serovar <i>konkukian</i> str. 97-27 |      | +  |  |  |   |  | +++  | + |
| <i>Carboxydotherrnus hydrogenoformans</i> Z-2901                  |      | +  |  |  |   |  | +    |   |
| <i>Desulfitobacterium</i> sp. Y51                                 |      | ++ |  |  | + |  | ++++ |   |
| <i>Geobacillus kaustophilus</i> HTA426                            |      | +  |  |  |   |  | +    | + |
| <i>Lactobacillus acidophilus</i> NCFM                             | +    |    |  |  |   |  | +    |   |
| <i>Lactobacillus johnsonii</i> NCC 533                            |      |    |  |  |   |  | +    |   |
| <i>Lactococcus lactis</i> subsp. <i>lactis</i> I11403             |      | +  |  |  |   |  |      |   |
| <i>Oceanobacillus iheyensis</i> HTE831                            |      | +  |  |  |   |  | +    | + |
| <i>Pediococcus pentosaceus</i>                                    |      |    |  |  |   |  |      |   |
| <i>Streptococcus mitis</i> NCTC 12261                             |      |    |  |  |   |  |      |   |
| <i>Streptococcus pneumoniae</i> R6                                |      |    |  |  |   |  |      |   |
| <i>Streptococcus pyogenes</i> M1 GAS                              |      |    |  |  |   |  |      |   |
| <b>Other</b>                                                      |      |    |  |  |   |  |      |   |
| <i>Blastopirellula marina</i> DSM 3645                            |      | +  |  |  | + |  |      |   |
| <i>Fusobacterium nucleatum</i> ATCC 25586                         |      | +  |  |  |   |  |      |   |
| <i>Pirellula</i> sp. 1                                            |      | +  |  |  |   |  | +    |   |
| <b>Alpha-proteobacteria</b>                                       |      |    |  |  |   |  |      |   |
| <i>Agrobacterium tumefaciens</i> str. C58                         | +++  |    |  |  |   |  |      |   |
| <i>Aurantimonas</i> sp. SI85-9A1                                  | +    | +  |  |  |   |  | +    |   |
| <i>Bartonella bacilliformis</i> KC583                             | +    |    |  |  |   |  |      |   |
| <i>Bartonella henselae</i> str. Houston-1                         | +    |    |  |  |   |  |      |   |
| <i>Bartonella quintana</i> str. Toulouse                          | +    |    |  |  |   |  |      |   |
| <i>Bradyrhizobium japonicum</i> USDA 110                          | ++   |    |  |  |   |  | +    |   |
| <i>Brucella abortus</i>                                           | +    |    |  |  |   |  | +    |   |
| <i>Brucella melitensis</i> 16M                                    | +    |    |  |  |   |  | ++   |   |
| <i>Brucella suis</i> 1330                                         | +    |    |  |  |   |  | +    |   |
| <i>Candidatus Pelagibacter ubique</i> HTCC1062                    | +    |    |  |  |   |  |      |   |
| <i>Caulobacter crescentus</i> CB15                                | +    |    |  |  |   |  |      |   |
| <i>Erythrobacter litoralis</i> HTCC2594                           | +    |    |  |  |   |  |      |   |
| <i>Erythrobacter</i> sp. NAP1                                     | +    |    |  |  |   |  |      |   |
| <i>Gluconobacter oxydans</i> 621H                                 | +    | +  |  |  | + |  | +    |   |
| <i>Hyphomonas neptunium</i> ATCC 15444                            | ++   |    |  |  | + |  |      |   |
| <i>Loktanella vestfoldensis</i> SKA53                             | +    |    |  |  |   |  |      |   |
| <i>Magnetospirillum magneticum</i> AMB-1                          | +    | +  |  |  | + |  | +    |   |
| <i>Maricaulis maris</i> MCS10                                     | +    |    |  |  |   |  |      |   |
| <i>Mesorhizobium loti</i> MAFF303099                              | +++  |    |  |  |   |  |      |   |
| <i>Mesorhizobium</i> sp. BNC1                                     | ++   | +  |  |  | + |  |      |   |
| <i>Nitrobacter hamburgensis</i> X14                               | +    |    |  |  |   |  |      |   |
| <i>Novosphingobium aromaticivorans</i>                            | +    |    |  |  |   |  |      |   |
| <i>Oceanicola batsensis</i> HTCC2597                              | +    |    |  |  |   |  |      |   |
| <i>Rhizobium leguminosarum</i> bv. <i>viciae</i> 3841             | +++  |    |  |  |   |  |      |   |
| <i>Rhodobacter sphaeroides</i> 2.4.1                              | +    |    |  |  |   |  |      |   |
| <i>Rhodobacterales bacterium</i> HTCC2654                         | ++++ |    |  |  | + |  |      |   |

|                                                    |      |     |   |     |       |
|----------------------------------------------------|------|-----|---|-----|-------|
| <i>Rhodopseudomonas palustris</i> BisB5            | +    |     |   | +   |       |
| <i>Rhodopseudomonas palustris</i> CGA009           | +    |     |   | +   |       |
| <i>Rhodospirillum rubrum</i>                       |      | ++  |   | +   | +     |
| <i>Roseobacter denitrificans</i> OCh 114           | +++  | +   | + |     |       |
| <i>Roseobacter</i> sp. MED193                      | +++  |     |   |     |       |
| <i>Roseovarius nubinhibens</i> ISM                 | +++  |     |   |     |       |
| <i>Roseovarius</i> sp. 217                         | +++  |     |   |     |       |
| <i>Silicibacter pomeroyi</i> DSS-3                 | ++   |     |   |     |       |
| <i>Silicibacter</i> sp. TM1040                     | ++   |     |   |     |       |
| <i>Sinorhizobium meliloti</i> 1021                 | ++++ |     |   |     |       |
| <i>Sphingopyxis alaskensis</i> RB2256              | +    |     |   |     |       |
| <i>Sulfitobacter</i> sp. EE-36                     | ++   |     |   |     |       |
| <i>Sulfitobacter</i> sp. NAS-14.1                  | ++   |     |   |     |       |
| <i>Zymomonas mobilis</i> subsp. <i>mobilis</i> ZM4 |      | +   | + |     |       |
| <b>Beta-proteobacteria</b>                         |      |     |   |     |       |
| <i>Azoarcus</i> sp. EbN1                           |      | ++  |   |     | +     |
| <i>Bordetella avium</i>                            | ++   |     |   |     |       |
| <i>Bordetella bronchiseptica</i> RB50              | +++  |     | + | +   |       |
| <i>Bordetella parapertussis</i> 12822              | ++   |     |   | +   |       |
| <i>Bordetella pertussis</i> Tohama I               | +++  |     | + |     |       |
| <i>Burkholderia cenocepacia</i> J2315              | ++   | +++ | + | +++ | +     |
| <i>Burkholderia cepacia</i> R1808                  |      | +++ | + | ++  |       |
| <i>Burkholderia cepacia</i> R18194                 |      | ++  |   | ++  | +     |
| <i>Burkholderia fungorum</i>                       | +++  | ++  | + | +   | +     |
| <i>Burkholderia mallei</i> ATCC 23344              | +++  | ++  |   | +   | +     |
| <i>Burkholderia pseudomallei</i> 1710b             | +++  | ++  |   | +   | +     |
| <i>Burkholderia pseudomallei</i> K96243            | +++  | ++  |   | +   | +     |
| <i>Burkholderia vietnamiensis</i> str. G4 (R1808)  |      | +++ | + | ++  |       |
| <i>Burkholderia xenovorans</i> LB400               | ++++ | ++  | + | +   | +     |
| <i>Chromobacterium violaceum</i> ATCC 12472        |      | +   |   | +   |       |
| <i>Dechloromonas aromatica</i> RCB                 |      | ++  |   | +   | +     |
| <i>Neisseria gonorrhoeae</i> FA 1090               | +    | +   | + | ++  |       |
| <i>Neisseria lactamica</i> ST-640                  | +    | +   | + | ++  |       |
| <i>Neisseria meningitidis</i> FAM18                | +    | +   | + | ++  |       |
| <i>Neisseria meningitidis</i> MC58                 | +    | +   | + | +   |       |
| <i>Neisseria meningitidis</i> Z2491                | +    | +   | + | +   |       |
| <i>Nitrosomonas eutropha</i> C71                   | +    |     |   |     |       |
| <i>Polaromonas</i> sp. JS666                       | ++   |     |   |     |       |
| <i>Ralstonia eutropha</i> JMP134                   | ++   | ++  |   | ++  | +     |
| <i>Ralstonia solanacearum</i> GMI1000              |      | +   |   | +   | +     |
| <i>Rhodoferax ferrireducens</i> DSM 15236          | +    | +   |   |     |       |
| <i>Rubrivivax gelatinosus</i> PM1                  | ++   |     |   | +   |       |
| <b>Delta-proteobacteria</b>                        |      |     |   |     |       |
| <i>Desulfotalea psychrophila</i> LSv54             |      | ++  |   | +   | ++    |
| <i>Desulfovibrio desulfuricans</i> G20             |      | ++  |   | +   | ++    |
| <i>Desulfovibrio vulgaris</i> str. Hildenborough   |      | ++  |   | +   | +++++ |
| <i>Desulfuromonas acetoxidans</i>                  |      | +   |   |     |       |
| <i>Geobacter sulfurreducens</i> PCA                |      | +   |   | ++  |       |
| <i>Geobacter uraniumreducens</i> Rf4               |      | +   |   | +   |       |
| <i>Syntrophobacter fumaroxidans</i> MPOB           |      | ++  |   |     |       |
| <b>Epsilon-proteobacteria</b>                      |      |     |   |     |       |
| <i>Campylobacter coli</i> RM2228                   |      | +   |   | +   | +     |

|                                                                       |    |    |   |    |   |     |     |
|-----------------------------------------------------------------------|----|----|---|----|---|-----|-----|
| <i>Campylobacter fetus</i> subsp. <i>fetus</i> 82-40                  |    |    | + |    |   | +   |     |
| <i>Campylobacter jejuni</i> RM1221                                    |    |    | + |    |   | +   | +   |
| <i>Campylobacter jejuni</i> subsp. <i>jejuni</i> 260.94               |    |    | + |    |   | +   | +   |
| <i>Campylobacter jejuni</i> subsp. <i>jejuni</i> 81-176               |    |    | + |    |   | +   | +   |
| <i>Campylobacter jejuni</i> subsp. <i>jejuni</i> 84-25                |    |    | + |    |   | +   | +   |
| <i>Campylobacter jejuni</i> subsp. <i>jejuni</i> CF93-6               |    |    | + |    |   | +   | +   |
| <i>Campylobacter jejuni</i> subsp. <i>jejuni</i> HB93-13              |    |    | + |    |   | +   | +   |
| <i>Campylobacter jejuni</i> subsp. <i>jejuni</i> NCTC 11168           |    |    | + |    |   | +   | +   |
| <i>Campylobacter lari</i> RM2100                                      |    |    | + |    |   | +   | +   |
| <i>Campylobacter upsaliensis</i> RM3195                               |    |    | + |    |   | +   | +   |
| <i>Helicobacter acinonychis</i> str. <i>Sheeba</i>                    |    |    | + |    |   | +   | +   |
| <i>Helicobacter hepaticus</i> ATCC 51449                              |    |    | + |    |   | +   | +   |
| <i>Helicobacter mustelae</i> 43772                                    |    |    | + |    |   | +   | +   |
| <i>Helicobacter pylori</i> 26695                                      |    |    | + |    |   | +   | ++  |
| <i>Helicobacter pylori</i> J99                                        |    |    | + |    |   | +   | ++  |
| <b>Gamma-proteobacteria</b>                                           |    |    |   |    |   |     |     |
| <i>Acinetobacter</i> sp. ADP1                                         | +  |    |   | +  |   | +   | +   |
| <i>Actinobacillus pleuropneumoniae</i> serovar 1 str. 4074            | +  | +  |   | +  |   | +   |     |
| <i>Alkalicoccus ehrlichei</i> MLHE-1                                  |    | +  |   |    |   | +   | +   |
| <i>Alteromonas macleodii</i> 'Deep ecotype'                           |    |    |   | ++ |   | +   |     |
| <i>Azotobacter vinelandii</i>                                         | +  | +  |   |    | + | +   | +   |
| <i>Chromohalobacter salexigens</i> DSM 3043                           | ++ |    |   |    | + | +   | +   |
| <i>Colwellia psychrerythraea</i> 34H                                  | +  | +  |   |    | + | +   | +   |
| <i>Erwinia carotovora</i> subsp. <i>atroseptica</i> SCRI1043          | +  | +  |   | +  |   | +   |     |
| <i>Escherichia coli</i> 042                                           | +  | +  |   | +  |   | +   | +   |
| <i>Escherichia coli</i> CFT073                                        | +  | +  |   | +  |   | +   | +   |
| <i>Escherichia coli</i> E2348/69                                      | +  | +  |   | +  |   | +   | +   |
| <i>Escherichia coli</i> K12                                           | +  | +  |   | +  |   | +   | +   |
| <i>Escherichia coli</i> O157:H7                                       | +  | +  |   | +  |   | +   | +   |
| <i>Escherichia coli</i> O157:H7 EDL933                                | +  | +  |   | +  |   | +   | +   |
| <i>Escherichia coli</i> W3110                                         | +  | +  |   | +  |   | +   | +   |
| <i>Francisella tularensis</i> subsp. <i>tularensis</i> Schu 4         | +  |    |   |    |   |     |     |
| <i>Haemophilus ducreyi</i> 35000HP                                    | +  | +  |   |    |   |     |     |
| <i>Haemophilus influenzae</i> 86-028NP                                | +  |    |   | +  |   | +   |     |
| <i>Haemophilus influenzae</i> R2846                                   | +  |    |   |    |   | +   |     |
| <i>Haemophilus influenzae</i> R2866                                   | +  |    |   | +  |   | +   |     |
| <i>Haemophilus influenzae</i> Rd KW20                                 | +  |    |   | +  |   | +   |     |
| <i>Haemophilus somnus</i> 129PT                                       |    | +  |   | +  |   | +   |     |
| <i>Haemophilus somnus</i> 2336                                        |    | +  |   | +  |   | +   |     |
| <i>Hahella chejuensis</i> KCTC 2396                                   | +  | +  |   |    | + |     | +   |
| <i>Idiomarina baltica</i> OS145                                       | +  |    |   |    |   |     |     |
| <i>Mannheimia succiniciproducens</i> MBEL55E                          |    | +  |   |    |   | +   |     |
| <i>Nitrococcus mobilis</i> Nb-231                                     | +  |    |   |    |   |     |     |
| <i>Pasteurella multocida</i> subsp. <i>multocida</i> str. <i>Pm70</i> | +  | +  |   |    |   | +   |     |
| <i>Photobacterium profundum</i> SS9                                   |    | ++ |   | +  | + | +++ | +++ |
| <i>Photorhabdus asymbiotica</i> subsp. <i>asymbiotica</i>             |    |    |   | +  |   |     |     |
| <i>Photorhabdus luminescens</i> subsp. <i>laumondii</i> TTO1          | +  |    |   | +  |   |     |     |
| <i>Proteus mirabilis</i> HI4320                                       |    | ++ |   | +  |   | +   |     |
| <i>Pseudoalteromonas atlantica</i> T6c                                | +  |    |   |    | + | +   |     |
| <i>Pseudoalteromonas haloplanktis</i> TAC125                          |    | +  |   |    |   | +   | +   |
| <i>Pseudoalteromonas tunicata</i> D2                                  | +  |    |   |    |   | +   |     |
| <i>Pseudomonas aeruginosa</i> 2192                                    | ++ |    |   |    | + | +   | +   |

|                                                                 |    |   |   |   |    |    |
|-----------------------------------------------------------------|----|---|---|---|----|----|
| <i>Pseudomonas entomophila</i> L48                              | +  |   |   | + | ++ | +  |
| <i>Pseudomonas fluorescens</i> Pf-5                             |    | + |   | + | +  | +  |
| <i>Pseudomonas fluorescens</i> PfO-1                            |    | + |   | + | +  | +  |
| <i>Pseudomonas fluorescens</i> SBW25                            | ++ |   |   | + | ++ | +  |
| <i>Pseudomonas putida</i> KT2440                                | +  |   |   | + | +  | +  |
| <i>Pseudomonas syringae</i> pv. <i>syringae</i> B728a           | +  |   |   |   |    |    |
| <i>Psychrobacter cryohalolentis</i> K5                          | +  |   |   |   | +  |    |
| <i>Psychrobacter</i> sp. 273-4                                  | +  |   |   |   | +  |    |
| <i>Reinekea</i> sp. MED297                                      | +  |   |   | + |    |    |
| <i>Salmonella enterica</i> serovar Typhi str. CT18              | +  |   | + |   | +  | +  |
| <i>Salmonella typhimurium</i> LT2                               | +  |   | + |   | +  | +  |
| <i>Serratia marcescens</i> Db11                                 | +  |   | + |   | +  | +  |
| <i>Shewanella amazonensis</i> SB2B                              |    | + |   | + | +  | +  |
| <i>Shewanella baltica</i> OS155                                 |    | + |   | + | +  | +  |
| <i>Shewanella frigidimarina</i> NCIMB 400                       |    | + |   | + | +  | +  |
| <i>Shewanella oneidensis</i> MR-1                               |    | + |   | + | ++ | +  |
| <i>Shewanella putrefaciens</i> CN-32                            |    | + |   | + | +  | +  |
| <i>Shewanella sediminis</i> HAW-EB3                             |    | + |   | + | +  | +  |
| <i>Shewanella</i> sp. PV-4                                      |    | + |   | + | +  | +  |
| <i>Shigella dysenteriae</i> M131649                             | +  |   | + |   | +  | +  |
| <i>Shigella flexneri</i> 2a str. 2457T                          | +  | + | + |   | +  | +  |
| <i>Shigella sonnei</i> 53G                                      | +  | + | + |   | +  | +  |
| <i>Shigella sonnei</i> Ss046                                    | +  | + | + |   | +  | +  |
| <i>Sodalis glossinidius</i> str. 'morsitans'                    | +  |   | + |   | +  |    |
| <i>Stenotrophomonas maltophilia</i> K279a                       | +  |   | + |   | +  | +  |
| <i>Vibrio cholerae</i> MO10                                     | +  |   |   | + | +  | +  |
| <i>Vibrio cholerae</i> NRT36s                                   | +  |   |   | + | +  | +  |
| <i>Vibrio cholerae</i> O1 biovar eltor str. N16961              | +  |   |   | + | +  | +  |
| <i>Vibrio cholerae</i> O395                                     | +  |   |   | + | +  | +  |
| <i>Vibrio parahaemolyticus</i> RIMD 2210633                     | +  |   | + |   | +  | ++ |
| <i>Vibrio</i> sp. Ex25                                          | +  |   | + |   | +  | ++ |
| <i>Vibrio</i> sp. MED222                                        | +  |   |   | + | +  | +  |
| <i>Vibrio splendidus</i> 12B01                                  | +  |   |   | + | +  | +  |
| <i>Vibrio vulnificus</i> CMCP6                                  |    | + |   | + | +  | +  |
| <i>Vibrio vulnificus</i> YJ016                                  |    | + |   | + | +  | +  |
| <i>Xanthomonas axonopodis</i> pv. <i>citri</i> str. 306         | +  |   |   |   |    |    |
| <i>Xanthomonas campestris</i> pv. <i>campestris</i> ATCC 33913  | +  |   |   |   |    |    |
| <i>Xanthomonas campestris</i> pv. <i>campestris</i> str. 8004   | +  |   |   |   |    |    |
| <i>Xanthomonas campestris</i> pv. <i>vesicatoria</i> str. 85-10 | +  |   |   |   |    |    |
| <i>Xanthomonas oryzae</i> pv. <i>oryzae</i> KACC10331           | +  |   |   |   |    |    |
| <i>Yersinia enterocolitica</i> 8081                             |    |   | + |   |    |    |
| <i>Yersinia pestis</i> biovar <i>Medievalis</i> str. 91001      | +  |   | + |   |    |    |
| <i>Yersinia pestis</i> CO92                                     | +  |   | + |   |    |    |
| <i>Yersinia pestis</i> KIM                                      | +  |   | + |   |    |    |
| <i>Yersinia pseudotuberculosis</i> IP 32953                     | +  |   | + |   |    |    |

Genes that are co-regulated and/or co-localized on the chromosome are shown on yellow background

"+" indicate the presence of the respective genes in the genomes
