# Supplementary material
Source: PubMed Central journal article supplement (PMC2650358)
Supplement: 0806798106_ST2_PDF.pdf [file 0806798106_ST2_PDF.pdf]

**Table S2.** Reconstructed lactate utilization regulons and candidate binding sites of lactate regulators

| Genome                                                                                                                       | Regulator ID*        | Regulated operon name     | First gene ID*        | Position <sup>†</sup> | Score <sup>‡</sup> | Site sequence <sup>§</sup>                                       | Upstream gene |
|------------------------------------------------------------------------------------------------------------------------------|----------------------|---------------------------|-----------------------|-----------------------|--------------------|------------------------------------------------------------------|---------------|
| <b>LldR (R1) regulon for lactate utilization (GntR family) in <math>\gamma</math>- and <math>\beta</math>-proteobacteria</b> |                      |                           |                       | <b>cutoff = 5.1</b>   |                    |                                                                  |               |
| <i>Escherichia coli</i> K12                                                                                                  | LldR                 | <i>lldP-lldR-lldD</i>     | <i>lldP</i>           | -216<br>-90           | 6.1<br>5.93        | AATTGGC <sub>c</sub> CTACCAATT<br>AATTGGCAGTGCCA <sub>c</sub> TT |               |
| <i>Shigella flexneri</i> 2a str. 301                                                                                         | SF3643               | <i>lldP-lldR-lldD</i>     | <i>SF3642</i>         | -189<br>-63           | 6.1<br>5.93        | AATTGGC <sub>c</sub> CTACCAATT<br>AATTGGCAGTGCCA <sub>c</sub> TT |               |
| <i>Salmonella typhimurium</i> LT2                                                                                            | STM3693              | <i>lldP-lldR-lldD</i>     | <i>STM3692</i>        | -218<br>-92           | 6.1<br>5.5         | AATTGGC <sub>c</sub> CTACCAATT<br>tATTGGCAGgACCA <sub>c</sub> TT |               |
| <i>Klebsiella pneumoniae</i> MGH78578                                                                                        | fig 573.2.peg.4021   | <i>lldP-lldR-lldD</i>     | fig 573.2.peg.4020    | -89                   | 6.03               | AATTGGC <sub>c</sub> GgGCCAATT                                   |               |
| <i>Azotobacter vinelandii</i>                                                                                                | Avin2953             | <i>lldP-ldhEFG-dldII</i>  | <i>Avin2954</i>       | -87                   | 5.95               | AATTGGTAtTACCAATT                                                | <i>lldR</i>   |
| <i>Pseudomonas entomophila</i> L48                                                                                           | PSEEN0769            | <i>lldP-lldD-dldII</i>    | <i>PSEEN0768</i>      | -62                   | 5.88               | AATTGGTctTACCAATT                                                |               |
| <i>Pseudomonas fluorescens</i> Pf-5                                                                                          | PFL_0818             | <i>lldP-ldhEFG-dldII</i>  | <i>PFL_0817</i>       | -67                   | 5.88               | AATTGGTctTACCAATT                                                | <i>lldR</i>   |
| <i>Pseudomonas aeruginosa</i> PAO1                                                                                           | PA4769               | <i>lldP-lldD-dldII</i>    | <i>PA4770</i>         | -127                  | 5.88               | AATTGGTctTACCAATT                                                | <i>lldR</i>   |
| <i>Pseudomonas putida</i> KT2440                                                                                             | PP4734               | <i>lldP-lldD-dldII</i>    | <i>PP4735</i>         | -67                   | 5.88               | AATTGGTctTACCAATT                                                | <i>lldR</i>   |
| <i>Stenotrophomonas maltophilia</i> K279a                                                                                    | fig 40324.1.peg.3656 | <i>lldP-lldR-lldD-dld</i> | fig 40324.1.peg.3655  | -176<br>-79           | 5.11<br>5.38       | AAaTGGTcGgACCAATa<br>tATTGGTACgACCAATa                           |               |
| <i>Acinetobacter</i> sp. ADP1                                                                                                | ACIAD0107            | <i>lldP-lldR-lldD-dld</i> | <i>ACIAD0106</i>      | -199<br>-94           | 5.52<br>5.95       | AATTGGTAtgACCAATa<br>AATTGGTAaTACCAATT                           |               |
| <i>Alkalilimnicola ehrlichei</i> MLHE-1                                                                                      | Mlg_2283             | <i>ldhEFG-lldP</i>        | <i>Mlg_2282</i>       | -88                   | 4.18               | AAGtGaTttgACCAATa                                                | <i>lldR</i>   |
| <i>Hahella chejuensis</i> KCTC 2396                                                                                          | HCH_01271            | <i>ldhEFG-dldII</i>       | <i>HCH_01270</i>      | -88                   | 5.95               | AATTGGTAtTACCAATT                                                | <i>lldR</i>   |
| <i>Chromohalobacter salexigens</i> DSM 3043                                                                                  | CsaI_0403            | <i>lldD-dldII</i>         | <i>CsaI_0404</i>      | -86                   | 5.59               | AATTGGTAaTACCAATa                                                | <i>lldR</i>   |
|                                                                                                                              |                      | <i>lldP</i>               | <i>CsaI_2686</i>      | -128                  | 5.59               | tATTGGTAtTACCAATT                                                |               |
| <i>Chromobacterium violaceum</i> ATCC 12472                                                                                  | CV3037               | <i>ldhEGF-dldII-lldP</i>  | <i>CV3030</i>         | -29                   | 5.88               | AATTGGTctTACCAATT                                                |               |
|                                                                                                                              |                      | <i>lldR</i>               | <i>CV3037</i>         | -28                   | <u>4.05</u>        | AtccGGTcagACCAATT                                                |               |
| <i>Neisseria meningitidis</i> MC58                                                                                           | NMB1711              | <i>lldP</i>               | <i>NMB0543</i>        | -109                  | 5.88               | AATTGGTctTACCAATT                                                |               |
|                                                                                                                              |                      | <i>NMB1712</i>            | <i>NMB1712</i>        | -222<br>14            | 4.75<br>4.78       | AATTGGactgACCAATc<br>AATTGGTttgACCAcTa                           | <i>lldR</i>   |
| <i>Dechloromonas aromatica</i> RCB                                                                                           | Daro_1767            | <i>ldhEFG-dldII-lldP</i>  | <i>Daro_1766</i>      | -46                   | 5.52               | tATTGGTctTACCAATT                                                | <i>lldR</i>   |
| <i>Rhodoferrax ferrireducens</i> T118                                                                                        | Rfer_0202            | <i>ldhEGF</i>             | <i>Rfer_0201</i>      | -52                   | 5.59               | tATTGGTAtTACCAATT                                                |               |
|                                                                                                                              |                      | <i>lldR</i>               | <i>Rfer_0202</i>      | -25                   | 5.88               | AATTGGTctTACCAATT                                                |               |
| <b>LldR2 (R2) regulon for lactate utilization (LysR family) in <i>Shewanella</i> spp.</b>                                    |                      |                           |                       | <b>cutoff = 5.2</b>   |                    |                                                                  |               |
| <i>Shewanella oneidensis</i> MR-1                                                                                            | SO3460               | <i>ldhEFG</i>             | <i>SO1520</i>         | -122                  | 6.21               | TAAATTAGggCTACTTATTTA                                            |               |
| <i>Shewanella putrefaciens</i> CN-32                                                                                         | Sputcn32_2769        | <i>ldhEFG</i>             | <i>Sputcn32_1270</i>  | -124                  | 6.2                | TAAATTAGgACTACTTATTTc                                            |               |
| <i>Shewanella putrefaciens</i> W3-18-1                                                                                       | Sputw3181_1243       | <i>ldhEFG</i>             | <i>Sputw3181_2836</i> | -124                  | 6.2                | TAAATTAGgACTACTTATTTc                                            |               |
| <i>Shewanella baltica</i> OS155                                                                                              | Sbal_3151            | <i>ldhEFG</i>             | <i>Sbal_1352</i>      | -122                  | 5.69               | TAAATTAGggCTACTTATTTc                                            |               |
| <i>Shewanella</i> sp. MR-4                                                                                                   | Shewmr4_1106         | <i>ldhEFG</i>             | <i>Shewmr4_2736</i>   | -92                   | 6.28               | TAAATTAGcgCTACTTATTTA                                            |               |
| <i>Shewanella</i> sp. MR-7                                                                                                   | Shewmr7_1172         | <i>ldhEFG</i>             | <i>Shewmr7_2809</i>   | -92                   | 6.28               | TAAATTAGcgCTACTTATTTA                                            |               |
| <i>Shewanella</i> sp. ANA-3                                                                                                  | Shewana3_1106        | <i>ldhEFG</i>             | <i>Shewana3_2906</i>  | -92                   | 6.28               | TAAATTAGcgCTACTTATTTA                                            |               |
| <i>Shewanella frigidimarina</i>                                                                                              | Sfri_1855            | <i>ldhEFG</i>             | <i>Sfri_1852</i>      | -134                  | 5.22               | TtAATTAGcACTACaTtTTat                                            | <i>lldR2</i>  |

|                                     |           |               |           |      |      |                       |              |
|-------------------------------------|-----------|---------------|-----------|------|------|-----------------------|--------------|
| <i>Shewanella loihica</i> PV-4      | Shew_3007 | <i>ldhEFG</i> | Shew_3004 | -155 | 6.08 | TAAATTAGcACTACTTATTat | <i>lldR2</i> |
| <i>Shewanella pealeana</i> ANG-SQ1  | Spea_1178 | <i>ldhEFG</i> | Spea_2996 | -169 | 5.8  | TAAATTAGcACTACTTtTTac |              |
| <i>Shewanella sediminis</i> HAW-EB3 | Ssed_3921 | <i>ldhEFG</i> | Ssed_3924 | -148 | 6.08 | TAAATTAGcACTACTTATTat | <i>lldR2</i> |

### LldR3 (R3) regulon for lactate utilization (GntR family) in Bacillales

cutoff = 5.8

|                                          |                |                         |         |     |      |                     |              |
|------------------------------------------|----------------|-------------------------|---------|-----|------|---------------------|--------------|
| <i>Bacillus subtilis</i>                 | Yvfl (Bsu3415) | <i>ldhEFG</i>           | yvflV   | -50 | 6.42 | CAGGTCATCAGATGACCTG |              |
|                                          |                | <i>lldP</i>             | yvflH   | -79 | 5.8  | CcaGTCATCAGATGAtCat | <i>lldR3</i> |
| <i>Bacillus halodurans</i> C-125         | BH1835         | <i>lldP-ldhEFG-yvfl</i> | BH1831  | -55 | 6.1  | tAaGTCATCTGATGACCTa |              |
| <i>Bacillus clausii</i> KSM-K16          | ABC0978        | <i>lldP-ldhEFG-yvfl</i> | ABC0974 | -54 | 6.28 | ataGTCATCTGATGACCat |              |
| <i>Bacillus licheniformis</i> ATCC 14580 | BL03455        | <i>ldhEFG</i>           | BL03456 | -45 | 6.36 | CAaGTCATCAGATGACCTG |              |
|                                          |                | <i>lldP</i>             | BL03613 | -56 | 6.04 | CAtGTCATCAGATGACtaG | <i>lldR3</i> |
| <i>Geobacillus kaustophilus</i> HTA426   | GK0396         | <i>ldhEFG</i>           | GK0395  | -51 | 5.87 | ataGTCATCAGATGACCcG |              |
|                                          |                | <i>lldP</i>             | GK0398  | -94 | 6.1  | CcGGTCATCTGATGACtGg | <i>lldR3</i> |
| <i>Oceanobacillus iheyensis</i> HTE831   | OB0369         | <i>lldP-yvfl-ldhEFG</i> | OB0368  | -72 | 6.38 | aAGGTCATCAGATGACCTt |              |
| <i>Bacillus cereus</i> ATCC 10987        | BCE1415        | <i>ldhEFG-yvfl</i>      | BCE1416 | -60 | 6.17 | ttaGTCATCTGATGACCat |              |

### LldR4 (R4) regulon for lactate utilization (GntR family) in Actinobacteria

cutoff = 5.0

|                                               |               |                    |               |      |      |                     |              |
|-----------------------------------------------|---------------|--------------------|---------------|------|------|---------------------|--------------|
| <i>Mycobacterium smegmatis</i> str. MC2 155   | MSMEG0586     | <i>ldhEFG</i>      | MSMEG0584     | -62  | 5.5  | cgTGTGGTCTGACCACa   | <i>lldR4</i> |
|                                               |               |                    |               | -28  | 6.3  | AgTGTGGTCAGACCACAGT |              |
| <i>Mycobacterium</i> sp. JLS                  | Mjls_4357     | <i>ldhEFG</i>      | Mjls_4358     | -63  | 5.92 | ggTGTGGTCcGACCACAtT | <i>lldR4</i> |
|                                               |               |                    |               | -39  | 6.34 | ACTGTGGTCAGACCACAGc |              |
| <i>Brevibacterium linens</i> BL2              | BlinB01001218 | <i>ldhEFG</i>      | BlinB01001219 | -121 | 5.5  | gtTaaGGTCTGACCACAtT | <i>lldR4</i> |
|                                               |               | <i>lldP-lldD</i>   | BlinB01001150 | -43  | 5.61 | ttaGTTGGTCTGACCACa  |              |
| <i>Propionibacterium acnes</i> KPA171202      | PPA0165       | <i>lldP-ldhEFG</i> | PPA0166       | -80  | 5.36 | AtatTGGTCgGACCAaAtc | <i>lldR4</i> |
| <i>Corynebacterium diphtheriae</i> NCTC 13129 | DIP0011       | <i>lldP-lldR</i>   | DIP0012       | -123 | 5.32 | tCTGTGGTCTtACCACtGT |              |
|                                               |               |                    |               | -109 | 5.75 | ACTGTGGTCAGACCAactc |              |
| <i>Corynebacterium efficiens</i> YS-314       | CE2757        | <i>lldP2-lldD</i>  | CE2761        | -30  | 5.31 | ctTGTGGTCTGACCACAtg |              |

### LldR5 (R5) regulon for lactate utilization (LysR family) in Vibrionales

|                                             |                                       |                             |           |      |      |                  |              |
|---------------------------------------------|---------------------------------------|-----------------------------|-----------|------|------|------------------|--------------|
| <i>Vibrio cholerae</i> O1 str. N16961       | VCA0982                               | <i>lldP-lldD-dldII</i>      | VCA0983   | -130 | 5.77 | TAATGAATTTTCATTA | <i>lldR5</i> |
| <i>Vibrio parahaemolyticus</i> RIMD 2210633 | VPA1497                               | <i>lldP-lldD</i>            | VPA1498   | -141 | 5.03 | TAATtAtTTTCATTA  | <i>lldR5</i> |
| <i>Vibrio vulnificus</i> CMCP6              | VV20796                               | <i>lldP-lldD-ldhEFG</i>     | VV20797   | -191 | 5.21 | gAATGAtTTTCATTA  |              |
|                                             | PBPRA1412,<br>PBPRA2361,<br>PBPRA2222 | <i>lldP1-ldhGEFG1-dldII</i> | PBPRA1411 | -70  | 4.39 | aAAcGAATTTTCaTc  | <i>lldR5</i> |
| <i>Photobacterium profundum</i> SS9         |                                       | <i>dld</i>                  | PBPRA2224 | -356 | 5.25 | TgATGAATTTTCATgA | <i>lldR5</i> |
|                                             |                                       | <i>lldP3-ldhEFG2-lldR2</i>  | PBPRA2357 | -459 | 4.57 | acAaGAAATTCATcA  |              |
| <i>Aeromonas hydrophila</i> ATCC 7966       | AHA_2561                              | <i>lldP-ldhGEFG-dldII</i>   | AHA_2560  | -131 | 4.18 | ATTGATcAACTTT    | <i>lldR5</i> |
|                                             |                                       |                             |           | -111 | 5.49 | AATGTTgTTCATT    |              |

\*Standard gene or protein identifiers are from GenBank.

† Position relative to the start of translation.

‡ Site search cutoff is given on the top. Site scores below cutoff are underlined.

§ Lowercase letters represent positions that do not conform to the consensus.
