# Supplementary material
Source: PubMed Central journal article supplement (PMC2650358)
Supplement: 0806798106_ST3_PDF.pdf [file 0806798106_ST3_PDF.pdf]

**Table S3.** Growth complementation of LDH-deficient *E. coli* K12 strains with *S. ondeidensis* MR-1 *dld-II* and *lldEFG* and *E. coli* K-12 *ykgEFG* genes

| <i>E. coli</i> K12 background | Plasmid overexpressed  | Substrate | Growth* |
|-------------------------------|------------------------|-----------|---------|
| $\Delta lldD$                 | pBAD <sup>†</sup>      | L-lactate | -       |
| $\Delta dld$                  | pBAD                   | D-lactate | -       |
| $\Delta lldD$                 | pBAD ( <i>dld-II</i> ) | L-lactate | -       |
| $\Delta dld$                  | pBAD ( <i>dld-II</i> ) | D-lactate | +       |
| $\Delta lldD$                 | pBAD ( <i>lldEFG</i> ) | L-lactate | +       |
| $\Delta lldD$                 | pBAD ( <i>lldEF</i> )  | L-lactate | -       |
| $\Delta lldD$                 | pBAD ( <i>lldE</i> )   | L-lactate | -       |
| $\Delta lldD$                 | pBAD ( <i>ykgEFG</i> ) | L-lactate | +       |
| $\Delta dld$                  | pBAD ( <i>lldEFG</i> ) | D-lactate | +       |
| $\Delta dld$                  | pBAD ( <i>ykgEFG</i> ) | D-lactate | +       |

\*Cell growth was monitored in a defined medium with L- or D-lactate as the only carbon source. (+) positive growth; (-) no growth within 30 hrs.

<sup>†</sup>As a negative control, the empty vector was expressed in the same strain.
