# Supplementary material
Source: PubMed Central journal article supplement (PMC2650358)
Supplement: 0806798106_ST4_PDF.pdf [file 0806798106_ST4_PDF.pdf]

**Table S4.** Bacterial strains and plasmids used in this study

| Strains                             | Genotype or markers; characteristics and uses                                                                                                                                                                                                                                                  | Reference or source                                                                         |
|-------------------------------------|------------------------------------------------------------------------------------------------------------------------------------------------------------------------------------------------------------------------------------------------------------------------------------------------|---------------------------------------------------------------------------------------------|
| <b><i>Shewanella oneidensis</i></b> |                                                                                                                                                                                                                                                                                                |                                                                                             |
| MR-1                                | Dissimilatory metal-reducing strain (Lake Oneida, NY)                                                                                                                                                                                                                                          | Myers and Nealson (1988) <i>Science</i> 240:1319-1321.                                      |
| $\Delta ldhA$                       | SO0968 ( <i>ldhA</i> ) deletion derivative of <i>S. oneidensis</i> MR-1                                                                                                                                                                                                                        | This study                                                                                  |
| $\Delta dld-II$                     | SO1521 ( <i>lldD</i> ) deletion derivative of <i>S. oneidensis</i> MR-1                                                                                                                                                                                                                        | This study                                                                                  |
| $\Delta lldE$                       | SO1520 ( <i>lldE</i> ) deletion derivative of <i>S. oneidensis</i> MR-1                                                                                                                                                                                                                        | This study                                                                                  |
| $\Delta lldF$                       | SO1519 ( <i>lldF</i> ) deletion derivative of <i>S. oneidensis</i> MR-1                                                                                                                                                                                                                        | This study                                                                                  |
| $\Delta lldG$                       | SO1518 ( <i>lldG</i> ) deletion derivative of <i>S. oneidensis</i> MR-1                                                                                                                                                                                                                        | This study                                                                                  |
| $\Delta dld-II\Delta lldF$          | SO1519 ( <i>lldF</i> )/SO1521 ( <i>lldD</i> ) double deletion derivative of <i>S. oneidensis</i> MR-1                                                                                                                                                                                          | This study                                                                                  |
| <b><i>Escherichia coli</i></b>      |                                                                                                                                                                                                                                                                                                |                                                                                             |
| BL21/DE3                            | Host used for purification of <i>S. oneidensis</i> MR-1 LdhA (SO0968)                                                                                                                                                                                                                          | Stratagene, La Jolla, CA                                                                    |
| DH10B (GeneHog)                     | Host used for overexpression of <i>E. coli</i> K12 <i>ykgEFG</i> and <i>S. oneidensis</i> MR-1 <i>dld-II</i> and <i>lldEFG</i> genes                                                                                                                                                           | Invitrogen, Carlsbad, CA                                                                    |
| Top10                               | Host used for construction of pBBR1MCS-5 clones. Invitrogen<br>F- <i>mcrA</i> $\Delta(mrr-hsdRMS-mcrBC)$ $\phi 80lacZ\Delta M15$ $\Delta lacX74$ <i>recA1</i> <i>araD139</i> $\Delta(ara-leu)7697$ <i>galU</i> <i>galK</i> <i>rpsL</i> ( <i>Str<sup>r</sup></i> ) <i>endA1</i> <i>nupG</i>     | Invitrogen, Carlsbad, CA                                                                    |
| EC100D <i>pir</i> -116              | Host used for construction of pDS3.1 clones; F <sup>-</sup> <i>mcrA</i> $\Delta(mrr-hsdRMS-mcrBC)$ $\phi 80lacZ\Delta M15$ $\Delta lacX74$ <i>recA1</i> <i>endA1</i> <i>araD139</i> $\Delta(ara, leu)7697$ <i>galU</i> <i>galK</i> $\lambda^{-}$ <i>rpsL</i> <i>nupG</i> <i>pir</i> -116(DHFR) | Epicenter Biotechnologies, Madison, WI                                                      |
| B2155 Ipir                          | Donor strain used for conjugation with <i>S. oneidensis</i> MR-1; <i>thrB1004 pro thi strA hsdS lacZ</i> $\Delta M15$ (F9 <i>lacZ</i> $\Delta M15$ <i>lacIq</i> <i>traD36 proA1 proB1</i> ) $\Delta dapA::erm$ (Erm <sup>r</sup> ) <i>pir</i> ::RP4 (::kan (Km <sup>r</sup> ) from SM10)       | Dehio and Meyer (1997) <i>J Bacteriol</i> 179:538-540.                                      |
| WM3064                              | Donor strain used for conjugation with <i>S. oneidensis</i> MR-1; <i>thrB1004 pro thi rpsL hsdS lacZ</i> $\Delta M15$ RP4-1360 ( <i>araBAD</i> )567 <i>dapA1341::[erm pir(wt)]</i>                                                                                                             | Saltikov, <i>et al.</i> (2003) <i>Appl Environ Microbiol</i> 69: 2800-2809.                 |
| $\Delta lldD$                       | Deletion derivative of <i>E. coli</i> K-12; Db3605 ( <i>lldD</i> ), used for complementation analysis                                                                                                                                                                                          | Baba and Mori (2008) <i>Methods Mol Biol</i> 416:171-81.                                    |
| $\Delta dld$                        | Deletion derivative of <i>E. coli</i> K-12; $\Delta b2133$ ( $\Delta dld$ ), used for complementation analysis                                                                                                                                                                                 | Baba and Mori (2008) <i>Methods Mol Biol</i> 416:171-81.                                    |
| <b><i>Bacillus subtilis</i></b>     |                                                                                                                                                                                                                                                                                                |                                                                                             |
| 168 Marburg                         | Type strain, <i>trpC2</i>                                                                                                                                                                                                                                                                      | Culture collection of Japanese and European <i>B. subtilis</i> Functional Analysis Programs |

|                       |                                                                                                                                                            |                                                                                             |
|-----------------------|------------------------------------------------------------------------------------------------------------------------------------------------------------|---------------------------------------------------------------------------------------------|
| <i>yvfV</i> ::pMUTIN2 | <i>trpC2</i> , pMUTIN2 insertion in <i>yvfV</i> ( <i>Bsu3402</i> ), <i>Em<sup>r</sup></i>                                                                  | Culture collection of Japanese and European <i>B. subtilis</i> Functional Analysis Programs |
| <i>yvfW</i> ::pMUTIN2 | <i>trpC2</i> , pMUTIN2 insertion in <i>yvfW</i> ( <i>Bsu3401</i> ), <i>Em<sup>r</sup></i>                                                                  | Culture collection of Japanese and European <i>B. subtilis</i> Functional Analysis Programs |
| <i>yvbY</i> ::pMUTIN2 | <i>trpC2</i> , pMUTIN2 insertion in <i>yvbY</i> ( <i>Bsu3401</i> ), <i>Em<sup>r</sup></i>                                                                  | Culture collection of Japanese and European <i>B. subtilis</i> Functional Analysis Programs |
| <b>Plasmids</b>       |                                                                                                                                                            |                                                                                             |
| pBAD-TOPO             | 4.1-kb vector used for gene expression in <i>E. coli</i> ; <i>Amp<sup>r</sup></i> , <i>araC</i>                                                            | Invitrogen, Carlsbad, CA                                                                    |
| pDS3.0                | Suicide vector derived from pCDV224; <i>Amp<sup>r</sup></i> , <i>Gm<sup>r</sup></i> , <i>sacB</i>                                                          | Wan, <i>et al.</i> (2004) <i>J Bacteriol</i> 186:8385-8400.                                 |
| pBBR1MCS-5            | 5.1-kb broad-host range plasmid; <i>Gm<sup>r</sup></i> , <i>lacZ</i>                                                                                       | Kovach, <i>et al.</i> (1994) <i>BioTechniques</i> 16, 800–802.                              |
| pMCSG7                | Vector used for cloning <i>ldhA</i>                                                                                                                        | Stols, <i>et al.</i> (2002) <i>Protein Expr Purif</i> 25, 8-15.                             |
| pBAD (SO1521)         | SO1521 gene was cloned into pBAD-TOPO                                                                                                                      | This study                                                                                  |
| pBAD (SO1518-19-20)   | 2.7-kb PCR fragment containing <i>lldEFG</i> operon was cloned into pBAD-TOPO                                                                              | This study                                                                                  |
| pBAD (SO1519-20)      | 2.1-kb PCR fragment containing <i>lldEF</i> genes was cloned into pBAD-TOPO                                                                                | This study                                                                                  |
| pBAD (SO1520)         | SO1520 gene was cloned into pBAD-TOPO                                                                                                                      | This study                                                                                  |
| pBAD (YkgEFG)         | 2.8-kb PCR fragment containing <i>E. coli</i> K-12 <i>ykgEFG</i> genes (b0306-8) was cloned into pBAD-TOPO                                                 | This study                                                                                  |
| pBBR <i>lldEFG</i>    | <i>lldEFG</i> 2.7 kb <i>Bam</i> HI- <i>Pme</i> I restriction fragment of pBAD- <i>lldEFG</i> cloned in the <i>Bam</i> HI- <i>Pvu</i> II site of pBBR1MCS-5 | This study                                                                                  |
| pBBR <i>dld-II</i>    | <i>dld-II</i> PCR product cloned into the x site of pBBR1MCS-5                                                                                             | This study                                                                                  |
| pDSD <i>ldhA</i>      | 2-kb fusion PCR fragment encoding DNA flanking <i>ldhA</i> cloned in pDS3.0; used to delete <i>ldhA</i> from the MR-1 genome                               | This study                                                                                  |
| pDSD <i>dld-II</i>    | 2-kb fusion PCR fragment encoding DNA flanking <i>dld-II</i> cloned in pDS3.0; used to delete <i>dld-II</i> from the MR-1 genome                           | This study                                                                                  |
| pDSD <i>lldE</i>      | 2-kb fusion PCR fragment encoding DNA flanking <i>lldE</i> cloned in pDS3.0; used to delete <i>lldE</i> from the MR-1 genome                               | This study                                                                                  |
| pDSD <i>lldF</i>      | 2-kb fusion PCR fragment encoding DNA flanking <i>lldF</i> cloned in pDS3.0; used to delete <i>lldF</i> from the MR-1 genome                               | This study                                                                                  |
| pDSD <i>lldG</i>      | 2-kb fusion PCR fragment encoding DNA flanking <i>lldG</i> cloned in pDS3.0; used to delete <i>lldG</i> from the MR-1 genome                               | This study                                                                                  |

---
